# Supplementary material for: High performance composite polymer electrolytes using polymeric ionic liquid-functionalized graphene molecular brushes
Source: Royal Society of Chemistry journal article supplement (doi:10.1039/c5ta02940f), 2015-01-01
Supplement: c5ta02940f1.pdf [file c5ta02940f1.pdf]

## Supporting Information

### High performance composite polymer electrolyte using polymeric ionic liquid-functionalized graphene molecular brushes

Yun-Sheng Ye,<sup>a\*</sup> Hao Wang,<sup>a</sup> Shu-Guang Bi,<sup>a</sup> Yang Xue,<sup>a</sup> Zhi-Gang Xue,<sup>a</sup> Xing-Ping Zhou,<sup>a</sup> Xiao-Lin Xie,<sup>a\*</sup> Yiu-Wing Mai<sup>b</sup>

- <sup>a</sup>. Address here. Key Laboratory for Large-Format Battery Materials and Systems, Ministry of Education, School of Chemistry and Chemical Engineering, Huazhong University of Science and Technology, Wuhan 430074, China.
- <sup>b</sup>. Centre for Advanced Materials Technology (CAMT), School of Aerospace, Mechanical and Mechatronic Engineering J07, The University of Sydney, Sydney NSW 2006, Australia

| Solvent            | Dispersibility of modified graphene |        |          |            |          |          |        |   |
|--------------------|-------------------------------------|--------|----------|------------|----------|----------|--------|---|
|                    | PEG-N <sub>3</sub>                  | PEG-FG | PIL-(Br) | PIL(Br)-FG | PIL-TFSI | PIL-B-FG | PIL-FG |   |
| H <sub>2</sub> O   | ○                                   | ○      | ○        | ○          | ×        | ×        | ○      | × |
| CH <sub>3</sub> OH | ○                                   | ○      | ○        | ○          | ○        | ○        | ○      | ○ |
| Acetone            | ○                                   | ○      | ○        | △          | ○        | △        | ○      | ○ |
| THF                | ○                                   | ○      | ○        | ○          | ○        | ○        | ○      | ○ |
| DMSO               | ○                                   | ○      | △        | △          | ○        | ○        | △      | ○ |
| DMF                | ○                                   | ○      | ○        | ○          | ○        | ○        | ○      | ○ |
| CHCl <sub>3</sub>  | ○                                   | ○      | ○        | ○          | ○        | ○        | ○      | ○ |
| Toluene            | ○                                   | △      | ○        | △          | ×        | ×        | ○      | ○ |
| EA                 | ○                                   | ○      | ○        | △          | △        | ×        | ○      | ○ |
| EG                 | ○                                   | ○      | ○        | ○          | ×        | ○        | ○      | △ |

○ : Well dispersion  
△ : Partial dispersion  
× : Poor dispersion

Figure S1. Dispersibility of polymer-FGs in tested solvents.

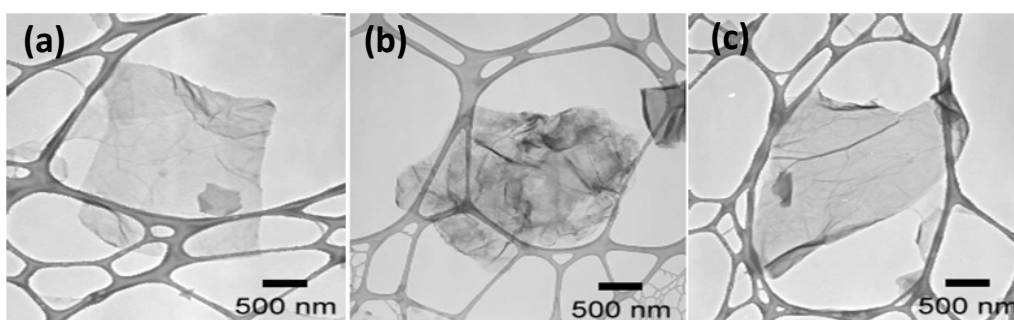

Figure S2. TEM images of (a) PIL(TFSI)-FG, (b) PEG-FG<sub>brush</sub> and (c) PIL(TFSI)-FG<sub>brush</sub>.

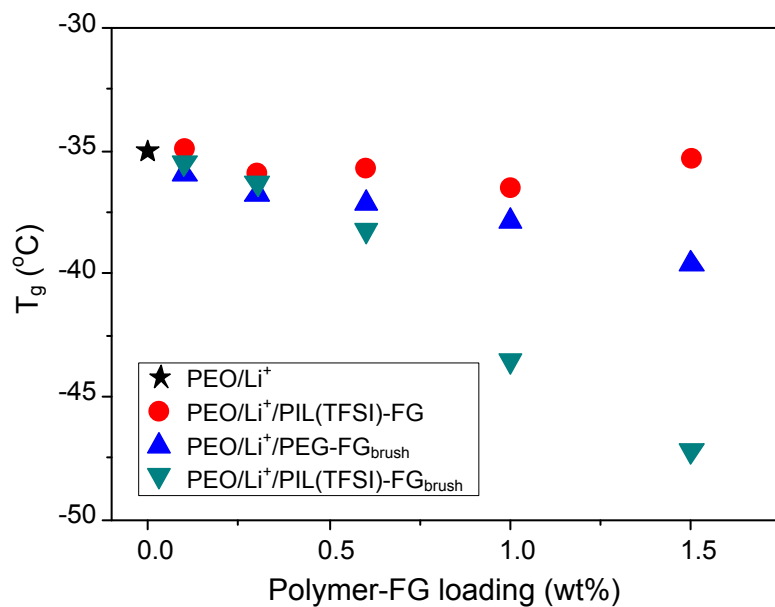

Figure S3. Thermal properties of PEO/Li<sup>+</sup> and PEO/Li<sup>+</sup>/polymer-FG CPEs.

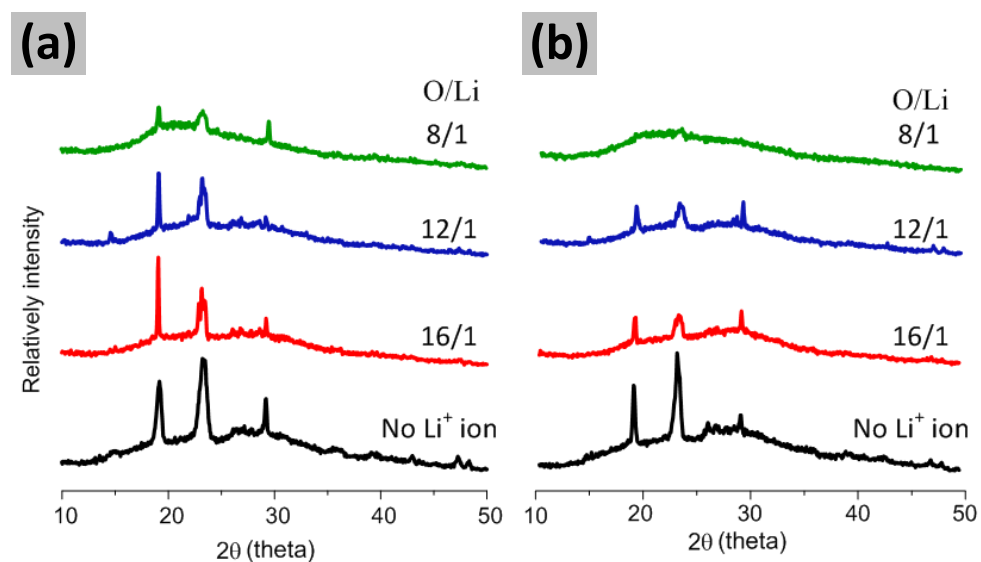

Figure S4. XRD pattern of (a) PEO/Li<sup>+</sup> and (b) PEO/Li<sup>+</sup>/PIL(TFSI)-FG<sub>brush</sub>.

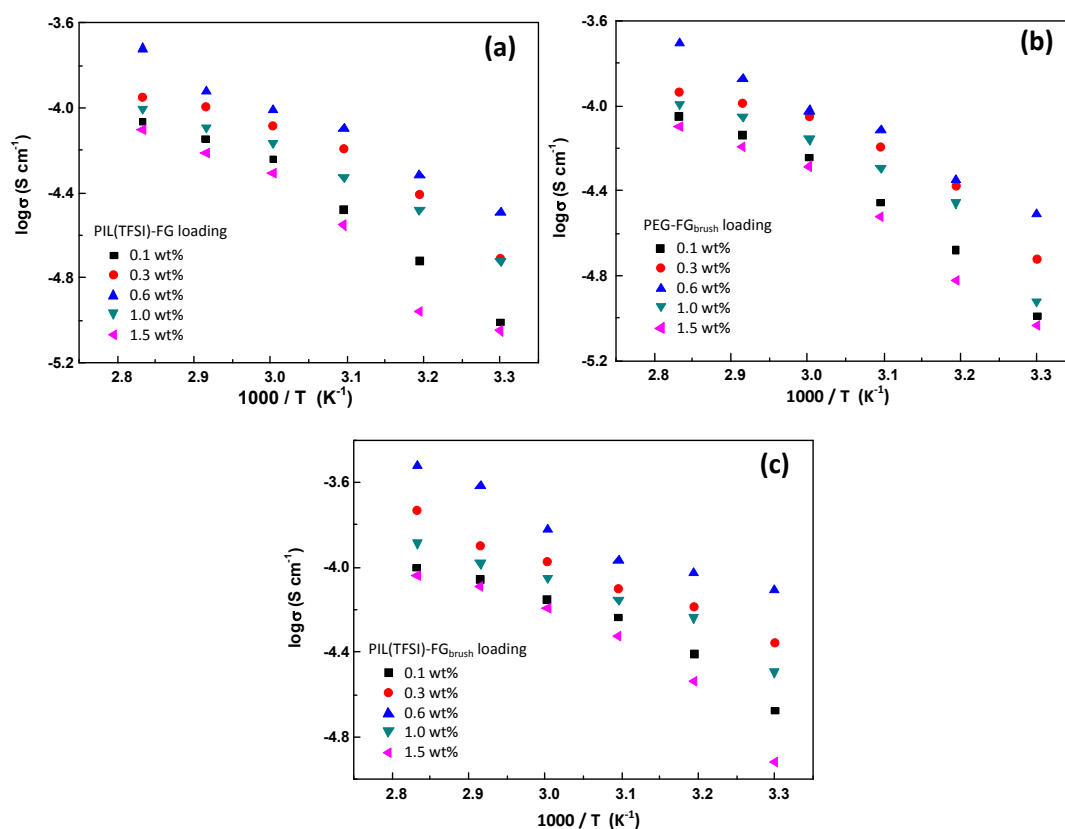

Figure S5. The ionic conductivity of PEO/Li<sup>+</sup> PEs with various polymer-FG contents at 30-80 °C.

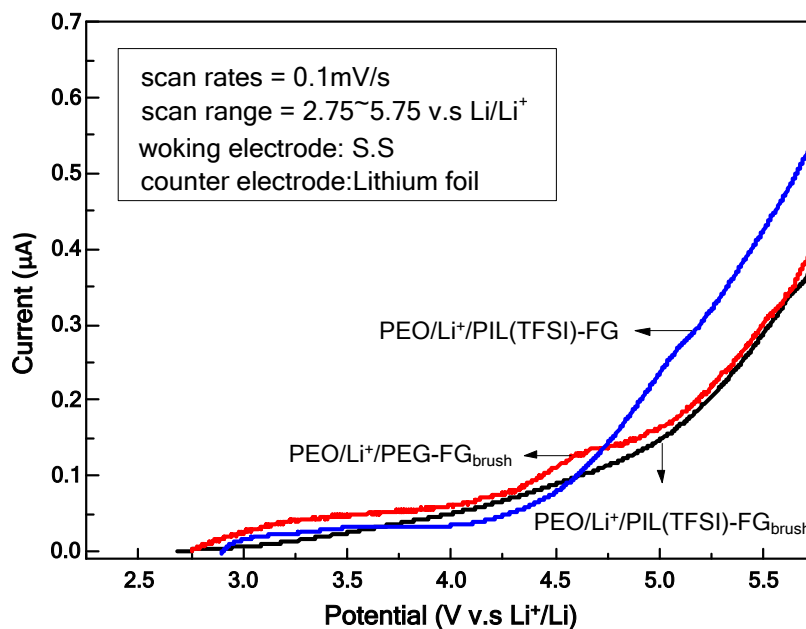

Figure S6. Linear sweep voltammograms of PEO/Li<sup>+</sup>/polymer-FG at 60 °C at a scan rate of 0.1 mV s<sup>-1</sup>.

### Calculation of Grafting Density

$$\bar{A}_{pg1} = M_C W_P / M_P W_C \text{ (chains per carbon)} \quad \text{eq S1}$$

The grafting density can also be expressed in the following relationship:

$$\bar{A}_{pg2} = M_C W_P \times 10^8 / M_P A_b W_C \text{ (average chain density on a both sides)} \quad \text{eq S2}$$

Where:  $M_C$  is the relative molar mass of carbon ( $M_C = 12 \text{ g mol}^{-1}$ ),  $M_P$  the average molecular weight ( $M_n$ ) of grafted polymer (calculated from GPC), and  $W_C$  and  $W_P$  the weight fractions of the polymer-graphene backbone (not including propargyl phenyl groups and grafted polymer) and the grafted polymer, respectively.  $A_b$  represents the area of a benzene ring in graphene ( $5.24 \text{ \AA}^2$ ).  $W_C$  and  $W_P$  can be readily obtained from the TGA curves of polymer functionalized graphene composite because the polymer functionalized graphene has a weigh loss stage below  $600 \text{ }^\circ\text{C}$ , and the decomposed weight fraction above  $800 \text{ }^\circ\text{C}$  is assigned to  $W_P$  and propargyl phenyl groups.

---
